# Supplementary material
Source: PubMed Central journal article supplement (PMC2996414)
Supplement: 1008365107_pnas.201008365SI.pdf [file 1008365107_pnas.201008365SI.pdf]

# Supporting Information

Hafner et al. 10.1073/pnas.1008365107

## SI Materials and Methods

**Patients and Samples.** In total, 175 SK from 25 patients (13 male and 12 female) were analyzed [16 Spanish (S) patients with 128 SK and 9 German (G) patients with 47 SK; average seven lesions/patient]. Age of appearance of the first SK ranged from 15 to 70 y (mean age, 48 y). The total number of SK was estimated by visual examination: Five patients had 10–25 SK, 2 patients had 25–50 SK, 9 patients had 50–100 SK, and 9 patients had >100 SK. SK were removed by curettage; half were immediately frozen in liquid nitrogen and stored, and the other half were formalin fixed and embedded in paraffin. The characteristics of the patients and SK are shown in [Dataset S1](#).

**Pathological Assessment.** A single dermatopathologist (C.H.) assessed all SK according to uniform criteria. There were 105 acanthotic, 54 hyperkeratotic, and 16 adenoid SK. The proportion of hyperkeratotic SK was higher among the Spanish than among the German patients (36% vs. 17%,  $P = 0.017$ ), in contrast to the proportion of acanthotic SK (52% vs. 81%,  $P = 0.001$ ).

**Mutational Analyses.** DNA was isolated from frozen tissue after proteinase K digestion using the Qiagen DNeasy Mini Kit. *FGFR3* was investigated using a multiplex SNaPshot assay covering 11 hotspot mutations as described previously (1). A second independent PCR was used for confirmation. *PIK3CA* (E542K, E545G, E545K, H1047L, H1047R, and H1047Y), *HRAS* (G12A, G12C, G12D, G12S, G12V, Q61K, Q61L, and Q61R), and *PTPN11* (D61V, D61Y, E69K, A72T, A72V, E76G, and E76K) hotspot mutations were analyzed by Sequenom, using assays specifically designed for this project (information available upon request). A subset of all mutations was confirmed by direct sequencing of PCR products. *AKT1* mutations were detected by direct sequencing of exon 4 and confirmed by a second independent PCR. *TSC1* exons 3–23 were screened by heteroduplex analysis of PCR products (Light Scanner; Idaho Technology), as described elsewhere (2). Samples with an aberrant melting curve were sequenced and mutations were confirmed by a second PCR. For *PTEN*, exons 1–9 were amplified and analyzed using denaturing high performance liquid chromatography (DHPLC) (Transgenomics). PCR products showing abnormal DHPLC behavior were sequenced directly. In one patient, a germ-line *PTEN* intron 3 deletion (g.68202\_68206del CTTTT) of unknown functional relevance was identified. Primer sequence and PCR conditions of all investigated genes can be obtained from the authors. A subgroup of 14 SK without mutations in the above-mentioned genes were analyzed by a highly sensitive genotyping assay (OncoCarta Panel v1.0; Sequenom), comprising 238 mutations in 19 oncogenes (*ABL1*, *AKT1*, *AKT2*, *BRAF*, *CDK*, *EGFR*, *ERBB2*, *FGFR1*, *FGFR3*, *FLT3*, *HRAS*, *JAK2*, *KIT*, *KRAS*, *MET*, *NRAS*, *PDGFRA*, *PIK3CA*, and *RET*) (3). A subset of the mutations identified in these assays was subsequently confirmed using standard PCR amplification and direct sequencing of PCR products. *KRAS* exon 2 mutations were analyzed in an additional panel of 45 SK harboring mutations in *FGFR3* ( $n = 15$ ), *PIK3CA* ( $n = 15$ ), or neither of these genes ( $n = 15$ ).

**Functional Analysis of *TSC1* G1528C (D510H) Mutation.** To assess the effect of this variant on protein levels, the G1528C mutation was introduced by site-directed mutagenesis in frame with a C-terminal FLAG-tag as described (2). *TSC1* wild-type and mutant retroviruses were produced to transduce *TSC1*-null urothelial

cell lines HCV29 and 97-1 (4). Protein expression was analyzed in stably transduced cell pools as described (2), using anti-Hamartin (Invitrogen), anti-FLAG M2 (Stratagene), and anti-Tubulin (Serotec) antibodies and chemoluminescence. Quantitation was performed using a Bio-Rad GelDoc system and Quantity One software.

To assess the effect of the G1528C variant on splicing, RNA was retrotranscribed using random hexamers. To detect alternatively spliced transcripts, fragments spanning exons 14–15 and 14–17 were amplified using primers 14F GTGATCTGGCCTCTGAAGAAGATAGT and TSC1 15BR AGCTCCTTGCTGTGCGCGTCT or 17R AGGGCATGCTGCTGCCTCTTA, respectively, and PCR products were separated by agarose gel electrophoresis.

**Array Comparative Genomic Hybridization (aCGH).** Twenty SK (two lesions per patient) and the corresponding leukocyte germ-line DNA from the same individual were analyzed. DNAs were differentially labeled with the genomic DNA Labeling Kit Plus from Agilent Technologies. All samples were hybridized against double-color Human Genome CGH 4 × 44k (Agilent Technologies), spanning the entire human genome at a median resolution of 75 kb. Hybridizations were done according to the manufacturer's protocols. Arrays were scanned using an Agilent DNA Microarray scanner G2565CA (Agilent Technologies). Microarray data were extracted with Feature Extraction Software v.9.6. All of the samples were considered for the study after filtering for quality of hybridization according to the quality control parameter (DLRSpread) provided by DNA Analytics v4.0.76. Data analysis and chromosome segmentation were performed using DNA Analytics and the Aberration Detection Method 2 (AMD-2) algorithm to identify all aberrant intervals in the samples. Alterations in copy number in five or more consecutive probes with a 10% minimum of penetrance were scored as aberrations.

**X Chromosome Inactivation Analysis.** The human androgen receptor allele-specific PCR assay was used. Genomic DNA (1 μg) was digested with 10 units of DdeI in 1× buffer 4 for 3 h at 37 °C and an aliquot was digested with methylation-sensitive enzyme HpaII or HhaI. A sham reaction was prepared without enzyme. After overnight incubation at 37 °C, digestion was terminated by heating at 65 °C for 20 min. Human androgen receptor (AR) allele-specific PCR was performed using fluorescein amidite (FAM)-labeled primers: TCCAGAATCTGTTCCAGAGCGTGC and GCTGTGAAGGTTGCTGTTCTCAT (5). PCR was performed using HpaII- or HhaI-digested, or nondigested, DNA as template. PCR products were analyzed using the ABI 3130 Genetic Analyzer and the peak area was used to calculate the ratio of amplification of each allele before and after digestion.

**Immunohistochemical Analyses of Proliferation, Senescence, and Signaling Markers.** Tissue macroarrays (TMaA) were constructed using a 3-mm diameter punch as described (6). Each TMaA contained 16–21 SK and two to three samples of normal skin. Sections from paraffin-embedded tissues or TMaA were deparaffinized and processed for immunohistochemistry using either the Envision immunoperoxidase or alkaline phosphatase assays (Dako). The following antibodies were used: p14 (Ab-4; Neomarkers), p16 (Dako), p53 (DO7; Novocastra), Dec1 (rabbit polyclonal from A. Harris, Cancer Research UK, Oxford), HP-1γ (MAB3450; Chemicon International-Millipore), H3K9me3







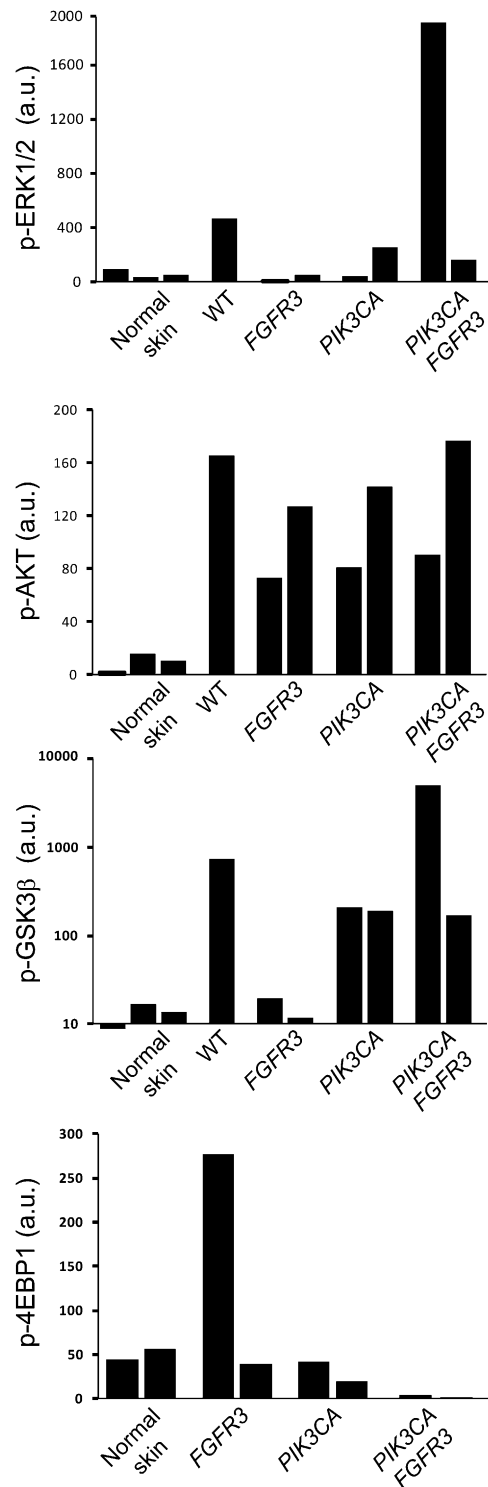

Fig. S3. Densitometric quantitation analysis of Western blotting results shown in Fig. 4.
